# Supplementary material
Source: Springer Nature journal article supplement (https://www.springermedizin.de/resource/supplementary/12936_2011_1918_MOESM15_ESM.pdf/9541982)
Supplement: MOESM15 [file 9541982]

Hill & Amatuzio 1949; *P.vivax* relapses in US soldiers serving in the South Pacific

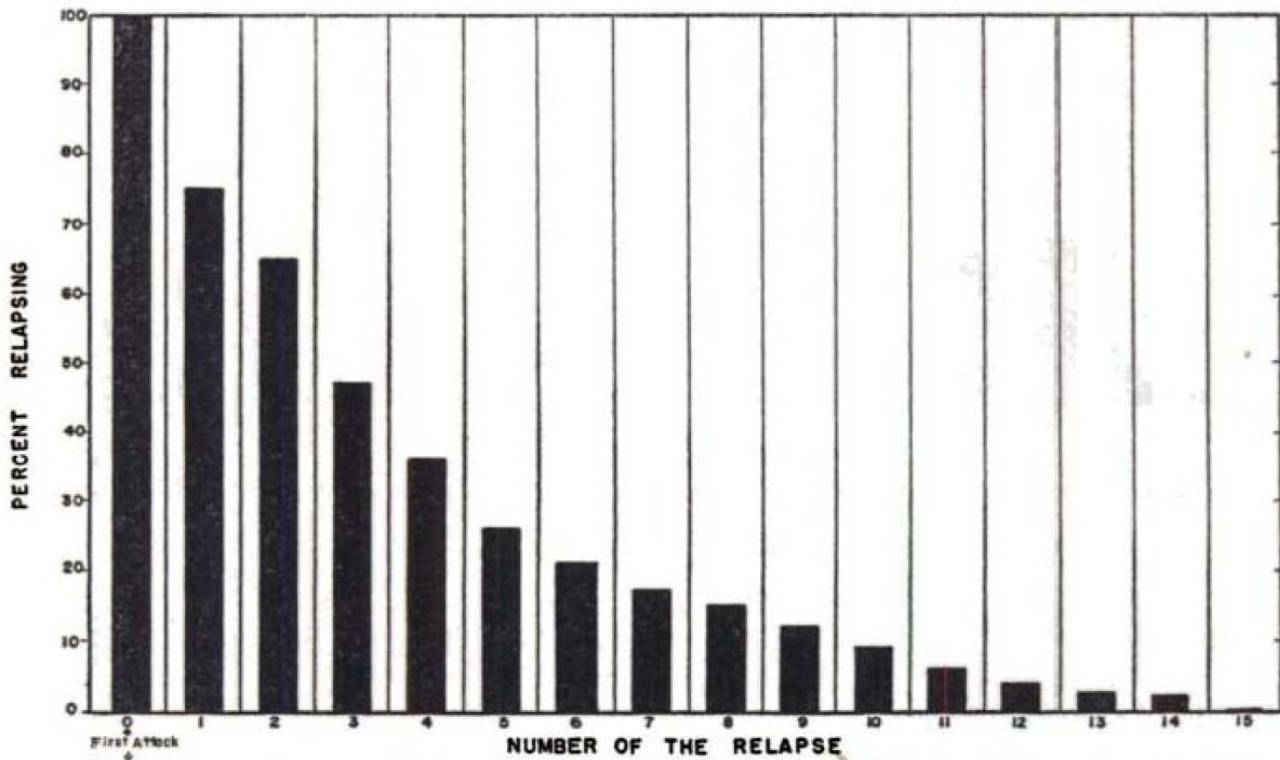

|                     |     |    |    |    |    |    |    |    |    |    |    |    |    |     |   |     |
|---------------------|-----|----|----|----|----|----|----|----|----|----|----|----|----|-----|---|-----|
| % of original group | 100 | 75 | 65 | 47 | 36 | 26 | 21 | 17 | 15 | 12 | 9  | 6  | 4  | 2.5 | 2 | 0.4 |
| recurring further   | 75  | 86 | 72 | 76 | 72 | 84 | 81 | 88 | 80 | 75 | 66 | 66 | 62 | 80  |   |     |
